# Supplementary material
Source: publisher figshare collection journal article supplement (https://gsapubs.figshare.com/articles/dataset/_/18822305)
Supplement: Supplementary file 1 [file 1]

Supplementary materials

## **Implications for Ediacaran biological evolution from the ~602 Ma Lantian biota in China**

Chuan Yang<sup>1,2</sup>, Yang Li<sup>1\*</sup>, David Selby<sup>3</sup>, Bin Wan<sup>4</sup>, Chengguo Guan<sup>4</sup>, Chuanming Zhou<sup>4</sup>, Xian-Hua Li<sup>1,4</sup>

<sup>1</sup>State Key Laboratory of Lithospheric Evolution, Institute of Geology and Geophysics, Chinese Academy of Sciences, Beijing 100029, China

<sup>2</sup>Geochronology and Tracers Facility, British Geological Survey, Keyworth NG12 5GG, UK

<sup>3</sup>Department of Earth Sciences, Durham University, DH1 3LE, UK

<sup>4</sup>State Key Laboratory of Palaeobiology and Stratigraphy, Nanjing Institute of Geology and Palaeontology, Chinese Academy of Sciences, Nanjing 210008, China

\*Corresponding author, email: [geoliy@outlook.com](mailto:geoliy@outlook.com)

## **1, X-ray CT Core Imaging**

CT Imaging of the Lantian drill core was conducted at the Department of Geography, Durham University using a Geotek X-ray CT core imaging system. Data from the 14-bit digital flat panel were collected as 16-bit grayscale TIFF images with a resolution of 0.1 mm. The images then were used to produce computed tomographic (CT) reconstructions by projecting data perpendicularly to the axis of the cores, and to visualize three-dimensional structures within cores. The x-ray source and detector positions were adjusted during the study in order to ensure optimal image quality and to accommodate the core diameters using Geotek CTQuickView.

## **2, X-ray Fluorescence Scanning**

Major and trace elements imaging was conducted at the Department of Geography, Durham University using a Geotek X-ray Fluorescence instrument. A down-core resolution of 1 mm and a cross-core resolution of 5 mm were used during this study. A wide range of elements (magnesium to uranium) have been detected, and the detection limits typically are better than 20 ppm for most elements, except for Mg (1800 ppm), Al (125 ppm) and Si (190 ppm). The measurement cell is flushed with helium to improve the sensitivity of light element (e.g., magnesium, aluminum and silicon) measurements. The data were processed using a MSCLXYZ Core Workstation.

### 3, Re-Os isotope composition analysis

A prescreening approach was used to target the best preserved shale with least post-depositional isotope exchange for Re-Os dating (Stein and Hannah, 2014). Fresh core samples without post-formation veining and weathering were selected, and then imaged by a Geotek X-ray CT Core Imaging System and a Geotek X-ray Fluorescence (XRF) at Durham University. Based on the CT imagery and XRF scan, a core interval with well-preserved sedimentary lamination and relative homogenous elemental patterns that suggest no evidence of chemical weathering and indicate a stable depositional environment (e.g., Si, Al, Fe) was used for Re-Os geochronology.

After cutting, drill core samples were polished using a diamond-encrusted polishing pad to remove cutting marks and eliminate any potential metal contamination from the saw blade. The samples were then air dried at 60°C for ~12 hours, broken into chips with no metal contact. Samples were crushed to a fine powder (~70 µm) in an agate mortar. The Re–Os isotope analyses were carried out at the Durham Geochemistry Centre (Laboratory for Sulfide and Source Rock Geochronology and Geochemistry, and Arthur Holmes Laboratory) at Durham University. A Cr<sup>VI</sup>–H<sub>2</sub>SO<sub>4</sub> solution was utilized to preferentially digest the organic fraction of the samples and thus liberate hydrogenous Re and Os budget, minimizing the contamination from detrital Re and Os (Selby and Creaser, 2003; Kendall et al., 2004).

The sample powder (~0.5 g) together with a known amount of mixed <sup>190</sup>Os+<sup>185</sup>Re tracer (spike) solution and 8 ml of 0.25 g/g Cr<sup>VI</sup>–H<sub>2</sub>SO<sub>4</sub> solution were digested in a sealed Carius tube for 48 h at 220 °C (Selby and Creaser, 2003). Rhenium was isolated from the solution using NaOH–C<sub>3</sub>H<sub>6</sub>O solvent extraction and

then purified by anion chromatography. Osmium was purified using solvent extraction ( $\text{CHCl}_3$ ) and micro-distillation methods (Cohen and Waters, 1996; Birck et al., 1997). The isolated Re and Os fractions were loaded onto Ni and Pt filaments, respectively (Selby, 2007). Isotopic measurements were conducted using a ThermoElectron TRITON mass spectrometer with the Re measurement in static Faraday collection mode and Os measurement in secondary electron multiplier peak-hopping mode. Total procedural blanks during this study were  $18.0 \pm 1.0$  pg and  $0.10 \pm 0.05$  pg (2SD,  $n = 4$ ) for Re and Os, respectively, with an average  $^{187}\text{Os}/^{188}\text{Os}$  value of  $0.20 \pm 0.05$  (2SD,  $n = 4$ ). Long-term mass spectrometry measurements of the in-house Re (ReStd) and Os (DROsS) reference solutions yield  $^{187}\text{Re}/^{185}\text{Re}$  ratio of  $0.5986 \pm 0.0004$  ( $n=702$ ) and  $^{187}\text{Os}/^{188}\text{Os}$  ratio of  $0.1609 \pm 0.0002$  ( $n=743$ ) respectively,

The Re-Os isotope data are regressed using an inverse isochron approach (Li and Vermeesch, 2021) and yield an isochron age of  $602.0 \pm 6.6$  Ma ( $2\sigma$ , same below) and an initial  $^{187}\text{Os}/^{188}\text{Os}$  of  $1.14 \pm 0.03$ . Including the decay constant uncertainty of  $^{187}\text{Re}$  (Smoliar et al., 1996) the age is  $602.0 \pm 6.9$  Ma. As discussed in detail by Davis (2021) and Li and Vermeesch (2021), the inverse isochron approach allows for better data visualization, and is able to give more accurate results when the uncertainties of input isotopic ratios are large (e.g.,  $>5\%$ ) and are strongly correlated (e.g., error correlations  $>0.99$ ). Although our measurements are very precise ( $0.15$ - $0.77\%$  for  $^{187}\text{Re}/^{188}\text{Os}$  and  $0.20$ - $1.2\%$  for  $^{187}\text{Os}/^{188}\text{Os}$ ) and are only moderately correlated ( $\rho = 0.581$ - $0.690$ ), we still used the inverse isochron approach here to yield the best age constraints for the Lantian biota. When using a Monte Carlo simulation (Li et al., 2019), the results are  $601.7 \pm 8.9/12.9$  Ma (uncertainties are presented as analytical only/model uncertainty included), with an initial  $^{187}\text{Os}/^{188}\text{Os}$  of  $1.141 \pm 0.025/0.037$ ; and an age of  $601.7 \pm 9.2/13.0$  after adding the decay constant uncertainty of  $^{187}\text{Re}$

(Smoliar et al., 1996). Our Monte Carlo simulation indicates that the final uncertainty of our isochron regression is predominately analytical (84%), this is in line with the small MSWD of the inverse isochron of 0.07.

For the final age of the Lantian biota, though the Monte Carlo approach gives more accurate estimates, we tentatively use the results from the inverse isochron approach to be comparable with literature data. But we report both results to permit future comparisons when the Monte Carlo approach becomes the default approach to Re-Os age determinations.

## References

- Birck, J. L., RoyBarman, M., and Capmas, F., 1997, Re-Os isotopic measurements at the femtomole level in natural samples: *Geostandards Newsletter-the Journal of Geostandards and Geoanalysis*, v. 21, no. 1, p. 19-27.
- Cohen, A. S., and Waters, F. G., 1996, Separation of osmium from geological materials by solvent extraction for analysis by thermal ionisation mass spectrometry: *Analytica Chimica Acta*, v. 332, no. 2-3, p. 269-275.
- Davis, D., 2021, Referee comment on "Short communication: Inverse isochron regression for Re–Os, K–Ca and other chronometers" by Yang Li and Pieter Vermeesch: *Geochronology Discussions*.
- Kendall, B. S., Creaser, R. A., Ross, G. M., and Selby, D., 2004, Constraints on the timing of Marinoan "Snowball Earth" glaciation by Re-187-Os-187 dating of a Neoproterozoic, post-glacial black shale in Western Canada: *Earth and Planetary Science Letters*, v. 222, no. 3-4, p. 729-740.
- Li, Y., Zhang, S., Hobbs, R., Caiado, C., Sproson, A. D., Selby, D., and Rooney, A. D., 2019, Monte Carlo sampling for error propagation in linear regression and applications in isochron geochronology: *Science Bulletin*, v. 64, no. 3, p. 189-197.
- Li, Y., and Vermeesch, P., 2021, Short communication: Inverse isochron regression for Re–Os, K–Ca and other chronometers: *Geochronology*, v. 3, no. 2, p. 415-420.
- Selby, D., and Creaser, R. A., 2003, Re-Os geochronology of organic rich sediments: an evaluation of organic matter analysis methods: *Chemical Geology*, v. 200, no. 3-4, p. 225-240.
- Selby, D., 2007, Direct Rhenium-Osmium age of the Oxfordian-Kimmeridgian boundary, Staffin bay, Isle of Skye, UK, and the Late Jurassic time scale: *Norwegian Journal of Geology*, v. 87, no. 3, p. 291-299.
- Smoliar, M. I., Walker, R. J., and Morgan, J. W., 1996, Re-Os ages of group IIA, IIIA, IVA, and IVB iron meteorites: *Science*, v. 271, no. 5252, p. 1099-1102.

## **List of supplementary tables**

Table S1, Major and trace element composition of the studied black shale of Lantian biota

Table S2, Re-Os isotope composition of the studied black shale of Lantian biota

Table S3, Compiled initial  $^{187}\text{Os}/^{188}\text{Os}$  values from Ediacaran black shale Re–Os geochronology
